# Supplementary material
Source: PubMed Central journal article supplement (PMC1386024)
Supplement: bj3940259add.pdf [file bj3940259add.pdf]

**Coupling of Protein Motions and Hydrogen Transfer during Catalysis by  
*Escherichia coli* Dihydrofolate Reductase**

Richard S. Swanwick,\* Giovanni Maglia,<sup>†</sup> Lai-hock Tey\* & Rudolf K. Allemann\*

\* School of Chemistry

Cardiff University

Main Building

Park Place

Cardiff, CF10 3AT, UK

and

<sup>†</sup> School of Chemistry

University of Birmingham

Edgbaston

Birmingham, B15 2TT, UK

**SUPPLEMENTARY MATERIAL**

---

**Table 1** Temperature dependence of the pre-steady state kinetic parameters at pH 7.0 for the reaction of NADPH and H<sub>2</sub>F catalysed by DHFR from *E. coli*. All data points are the average of at least 6 measurements. The errors are standard errors of the mean (for one sigma).

| T (°C) | $k_H$ (s <sup>-1</sup> ) | $k_D$ (s <sup>-1</sup> ) | KIE       |
|--------|--------------------------|--------------------------|-----------|
| 5      | 81.9 ± 1.7               | 26.9 ± 1.9               | 3.0 ± 0.2 |
| 10     | 106.3 ± 3.1              | 34.1 ± 3.4               | 3.1 ± 0.3 |
| 15     | 135.3 ± 5.6              | 44.6 ± 3.7               | 3.0 ± 0.3 |
| 20     | 159.8 ± 7.9              | 60.2 ± 4.1               | 2.7 ± 0.2 |
| 25     | 203.7 ± 7.4              | 75.1 ± 5.4               | 2.7 ± 0.2 |
| 30     | 235.4 ± 13.8             | 98.5 ± 2.8               | 2.4 ± 0.2 |
| 35     | 287.9 ± 12.0             | 125.9 ± 3.5              | 2.3 ± 0.1 |
| 40     | 362.7 ± 7.5              | 166.9 ± 6.4              | 2.2 ± 0.1 |

**Table 2** Temperature dependence of the steady state rates and the KIEs for the reaction between NADPH/NADPD and H<sub>2</sub>F catalyzed by DHFR at pH 9.5. All data points are the average of at least 6 measurements. The errors are standard errors of the mean (for one sigma).

| T (°C) | Rate (NADPH)<br>(s <sup>-1</sup> ) | Rate (NADPD)<br>(s <sup>-1</sup> ) | KIE           |
|--------|------------------------------------|------------------------------------|---------------|
| 5      | 0.349 ± 0.005                      | 0.175 ± 0.003                      | 1.995 ± 0.045 |
| 10     | 0.484 ± 0.004                      | 0.197 ± 0.002                      | 2.451 ± 0.032 |
| 15     | 0.600 ± 0.008                      | 0.208 ± 0.001                      | 2.885 ± 0.041 |
| 20     | 0.722 ± 0.009                      | 0.252 ± 0.004                      | 2.865 ± 0.058 |
| 25     | 0.927 ± 0.012                      | 0.341 ± 0.008                      | 2.718 ± 0.073 |
| 30     | 0.994 ± 0.005                      | 0.359 ± 0.006                      | 2.769 ± 0.048 |
| 35     | 1.090 ± 0.007                      | 0.385 ± 0.006                      | 2.831 ± 0.048 |

**Table 3** Temperature dependence of the pre-steady state kinetic parameters at pH 7.0 for the reaction of NADPH and H<sub>2</sub>F catalysed by G121V-DHFR. All data points are the average of at least 6 measurements. The errors are standard errors of the mean (for one sigma).

| T (°C) | $k_H$ (s <sup>-1</sup> ) | $k_D$ (s <sup>-1</sup> ) | KIE           |
|--------|--------------------------|--------------------------|---------------|
| 5      | 0.086 ± 0.001            | 0.038 ± 0.002            | 2.263 ± 0.022 |
| 10     | 0.104 ± 0.001            | 0.051 ± 0.001            | 2.040 ± 0.045 |
| 15     | 0.122 ± 0.003            | 0.071 ± 0.004            | 1.723 ± 0.016 |
| 20     | 0.147 ± 0.002            | 0.092 ± 0.001            | 1.598 ± 0.028 |
| 25     | 0.171 ± 0.004            | 0.118 ± 0.002            | 1.450 ± 0.042 |
| 30     | 0.196 ± 0.006            | 0.150 ± 0.003            | 1.307 ± 0.047 |
| 35     | 0.235 ± 0.008            | 0.201 ± 0.005            | 1.170 ± 0.049 |
